# Supplementary material for: Fatty acids' double role in the prebiotic formation of a hydrophobic dipeptide
Source: PubMed Central journal article supplement — Chem Sci. 2016 Feb 9;7(5):3406–13. doi: 10.1039/c5sc04796j (PMC6007129; doi:10.1039/c5sc04796j), 2016-02-09
Supplement: SC-007-C5SC04796J-s001.pdf [file SC-007-C5SC04796J-s001.pdf]

# Fatty acids' double role in the prebiotic formation of a hydrophobic dipeptide

Sara Murillo-Sánchez,<sup>a</sup> Damien Beaufils,<sup>b</sup> Juan Manuel González Mañas,<sup>c</sup> Robert Pascal\*<sup>b</sup> and Kepa Ruiz-Mirazo\*<sup>ad</sup>

---

<sup>a</sup> Biophysics Unit (CSIC, UPV/EHU), University of the Basque Country, Spain.

<sup>b</sup> Institut des Biomolécules Max Mousseron (IBMM, UMR 5247, CNRS/Université de Montpellier/ENSCM), Montpellier, France.

<sup>c</sup> Department of Biochemistry and Molecular Biology, University of the Basque Country, Spain.

<sup>d</sup> Department of Logic and Philosophy of Science, University of the Basque Country, Spain.

\*Corresponding authors: [robert.pascal@umontpellier.fr](mailto:robert.pascal@umontpellier.fr) and [kepa.ruiz-mirazo@ehu.eus](mailto:kepa.ruiz-mirazo@ehu.eus).

## Electronic supporting information (ESI)

### Table of Contents

|                                                                                            |     |
|--------------------------------------------------------------------------------------------|-----|
| <b>Fig. S1</b> Structure of the different surfactants used .....                           | S2  |
| <b>Table S1</b> Total yield and diastereomeric ratio in reactions in aqueous buffer .....  | S3  |
| <b>Table S2</b> Total yield and diastereomeric ratio in reactions in organic solvent ..... | S6  |
| <b>Fig. S2</b> Determination of CVCs .....                                                 | S7  |
| <b>Fig. S3</b> Binding of Ac-L-Tyr(Me)-L-Leu-NH <sub>2</sub> to OA and DA vesicles .....   | S8  |
| <b>Fig. S4</b> Interaction of Ac-L-Tyr(Me)-L-Leu-NH <sub>2</sub> with DA monolayers .....  | S9  |
| <b>Fig. S5</b> Chromatogram of the experiment with Ac-Leu-oxazolone .....                  | S10 |

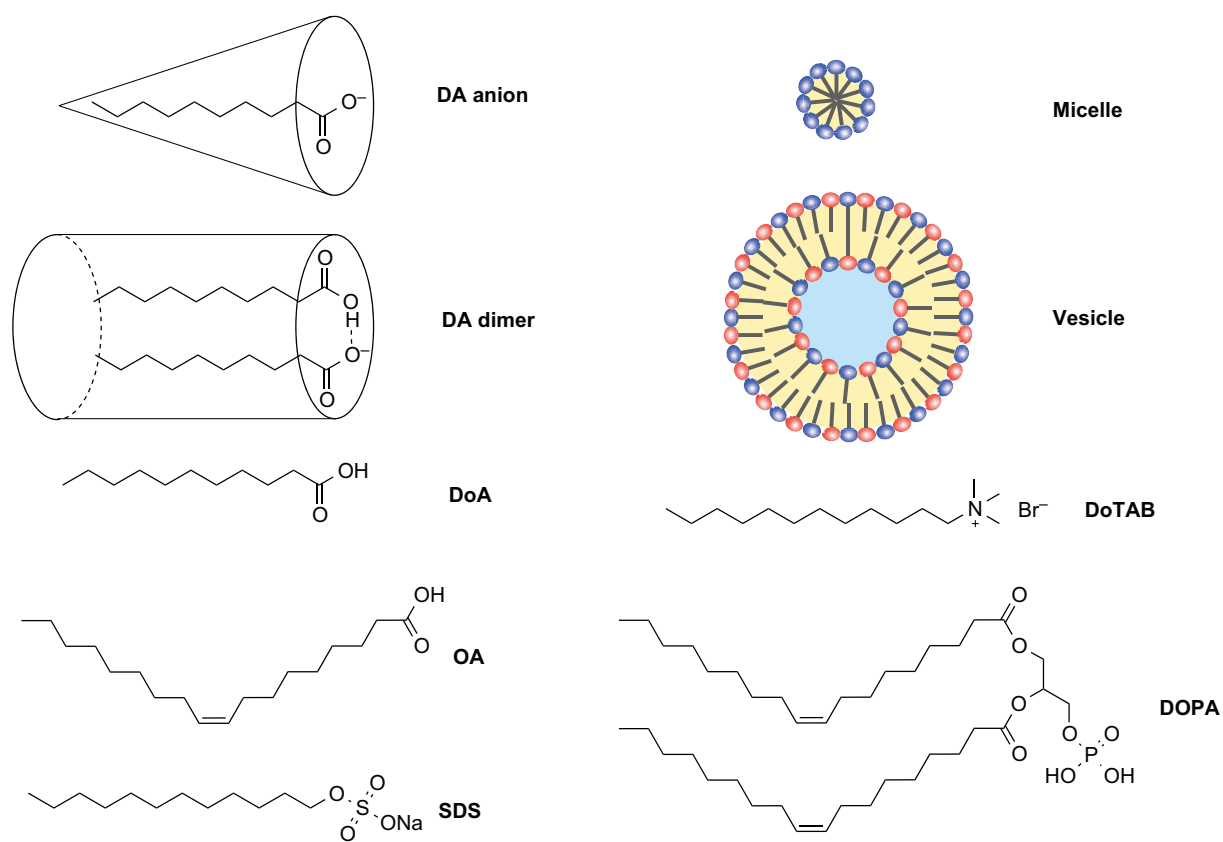

**Fig. S1** Decanoic acid structure and self-assembly properties, together with some of the additional amphiphiles and surfactants employed in this work. The overall size of polar heads (including solvation shell) compared to that of hydrophobic tails induces different supramolecular aggregation behaviours.

**Table S1** Total yield, measured by the relative HPLC areas of peptides products (detection at 273 nm), and diastereoselectivity (*d.r.* homochiral vs. heterochiral) in the reactions carried out in aqueous buffers from Ac-Tyr(Me) oxazolone (1mM) in the presence of nucleophiles (5 mM) and various amphiphiles/surfactants at room temperature. Given the large variety of conditions tried, most measurements were only performed once, so the errors were calculated as coefficients of variation: 13 % for pH 6.5, 19 % for pH 7.2, 12 % for pH 8 and 18 % for pH 9. This estimation was made from all the control samples, without amphiphile, at each pH, making use of the values of *d.r.* (since the yield is much more sensitive to small variations in the amount of nucleophile and to the degree of purity of the oxazolone in the stock solution).

| Surfactant type         | Concentration (mM) | Buffer (pH)       | Nucleophile           | Total yield (%) | <i>d.r.</i> |
|-------------------------|--------------------|-------------------|-----------------------|-----------------|-------------|
| Decanoic Acid           | 0                  | 100 mM MES (6.5)  | H-Leu-NH <sub>2</sub> | 8.9             | 1.30        |
| Decanoic Acid           | 2                  | 100 mM MES (6.5)  | H-Leu-NH <sub>2</sub> | 10.5            | 1.43        |
| Decanoic Acid           | 4                  | 100 mM MES (6.5)  | H-Leu-NH <sub>2</sub> | 10.1            | 1.38        |
| Decanoic Acid           | 6                  | 100 mM MES (6.5)  | H-Leu-NH <sub>2</sub> | 10.5            | 1.31        |
| Decanoic Acid           | 8                  | 100 mM MES (6.5)  | H-Leu-NH <sub>2</sub> | 10.9            | 1.52        |
| Decanoic Acid           | 10                 | 100 mM MES (6.5)  | H-Leu-NH <sub>2</sub> | 10.7            | 1.13        |
| Decanoic Acid           | 15                 | 100 mM MES (6.5)  | H-Leu-NH <sub>2</sub> | 20.7            | 0.66        |
| Decanoic Acid           | 25                 | 100 mM MES (6.5)  | H-Leu-NH <sub>2</sub> | 28.6            | 0.62        |
| Decanoic Acid           | 50                 | 100 mM MES (6.5)  | H-Leu-NH <sub>2</sub> | 29.9            | 0.57        |
| Decanoic Acid (x3)      | 0                  | 100 mM MOPS (7.2) | H-Leu-NH <sub>2</sub> | 21.3            | 1.81        |
| Decanoic Acid (x3)      | 10                 | 100 mM MOPS (7.2) | H-Leu-NH <sub>2</sub> | 20.5            | 1.63        |
| Decanoic Acid (x3)      | 15                 | 100 mM MOPS (7.2) | H-Leu-NH <sub>2</sub> | 20.0            | 1.44        |
| Decanoic Acid (x3)      | 18                 | 100 mM MOPS (7.2) | H-Leu-NH <sub>2</sub> | 22.5            | 1.16        |
| Decanoic Acid (x3)      | 20                 | 100 mM MOPS (7.2) | H-Leu-NH <sub>2</sub> | 29.0            | 0.74        |
| Decanoic Acid (x3)      | 24                 | 100 mM MOPS (7.2) | H-Leu-NH <sub>2</sub> | 36.8            | 0.53        |
| Decanoic Acid (x3)      | 28                 | 100 mM MOPS (7.2) | H-Leu-NH <sub>2</sub> | 42.8            | 0.44        |
| Decanoic Acid (x3)      | 30                 | 100 mM MOPS (7.2) | H-Leu-NH <sub>2</sub> | 43.4            | 0.42        |
| Decanoic Acid (x3)      | 50                 | 100 mM MOPS (7.2) | H-Leu-NH <sub>2</sub> | 42.8            | 0.37        |
| Decanoic Acid           | 0                  | 100 mM PIPPS (9)  | H-Leu-NH <sub>2</sub> | 3.2             | 2.60        |
| Decanoic Acid           | 10                 | 100 mM PIPPS (9)  | H-Leu-NH <sub>2</sub> | 3.0             | 2.19        |
| Decanoic Acid           | 15                 | 100 mM PIPPS (9)  | H-Leu-NH <sub>2</sub> | 3.6             | 2.60        |
| Decanoic Acid           | 18                 | 100 mM PIPPS (9)  | H-Leu-NH <sub>2</sub> | 3.5             | 2.03        |
| Decanoic Acid           | 20                 | 100 mM PIPPS (9)  | H-Leu-NH <sub>2</sub> | 3.3             | 2.17        |
| Decanoic Acid           | 24                 | 100 mM PIPPS (9)  | H-Leu-NH <sub>2</sub> | 2.5             | 1.27        |
| Decanoic Acid           | 28                 | 100 mM PIPPS (9)  | H-Leu-NH <sub>2</sub> | 3.3             | 2.25        |
| Decanoic Acid           | 30                 | 100 mM PIPPS (9)  | H-Leu-NH <sub>2</sub> | 3.2             | 1.98        |
| Decanoic Acid           | 50                 | 100 mM PIPPS (9)  | H-Leu-NH <sub>2</sub> | 3.26            | 1.86        |
| Decanoic Acid / Decanol | 0 / 0              | 100 mM MOPS (7.2) | H-Leu-NH <sub>2</sub> | 31.5            | 2.02        |
| Decanoic Acid / Decanol | 10 / 20            | 100 mM MOPS (7.2) | H-Leu-NH <sub>2</sub> | 33.5            | 1.16        |
| Decanoic Acid / Decanol | 15 / 15            | 100 mM MOPS (7.2) | H-Leu-NH <sub>2</sub> | 31.0            | 1.12        |
| Decanoic Acid / Decanol | 20 / 10            | 100 mM MOPS (7.2) | H-Leu-NH <sub>2</sub> | 34.0            | 1.02        |
| Dodecanoic Acid         | 0                  | 100 mM MES (6.5)  | H-Leu-NH <sub>2</sub> | 17.1            | 1.69        |
| Dodecanoic Acid         | 1                  | 100 mM MES (6.5)  | H-Leu-NH <sub>2</sub> | 19.9            | 1.89        |

|                 |     |                   |                       |      |      |
|-----------------|-----|-------------------|-----------------------|------|------|
| Dodecanoic Acid | 5   | 100 mM MES (6.5)  | H-Leu-NH <sub>2</sub> | 24.3 | 1.28 |
| Dodecanoic Acid | 10  | 100 mM MES (6.5)  | H-Leu-NH <sub>2</sub> | 33.5 | 0.74 |
| Dodecanoic Acid | 20  | 100 mM MES (6.5)  | H-Leu-NH <sub>2</sub> | 23.9 | 1.92 |
| Dodecanoic Acid | 0   | 100 mM MOPS (7.2) | H-Leu-NH <sub>2</sub> | 18.7 | 1.58 |
| Dodecanoic Acid | 1   | 100 mM MOPS (7.2) | H-Leu-NH <sub>2</sub> | 17.1 | 1.69 |
| Dodecanoic Acid | 5   | 100 mM MOPS (7.2) | H-Leu-NH <sub>2</sub> | 23.8 | 0.84 |
| Dodecanoic Acid | 10  | 100 mM MOPS (7.2) | H-Leu-NH <sub>2</sub> | 27.6 | 0.61 |
| Dodecanoic Acid | 20  | 100 mM MOPS (7.2) | H-Leu-NH <sub>2</sub> | 32.8 | 0.51 |
| Dodecanoic Acid | 0   | 100 mM MOPS (8)   | H-Leu-NH <sub>2</sub> | 11.0 | 1.30 |
| Dodecanoic Acid | 1   | 100 mM MOPS (8)   | H-Leu-NH <sub>2</sub> | 13.9 | 1.40 |
| Dodecanoic Acid | 5   | 100 mM MOPS (8)   | H-Leu-NH <sub>2</sub> | 33.4 | 0.75 |
| Dodecanoic Acid | 10  | 100 mM MOPS (8)   | H-Leu-NH <sub>2</sub> | 35.7 | 0.62 |
| Dodecanoic Acid | 20  | 100 mM MOPS (8)   | H-Leu-NH <sub>2</sub> | 34.8 | 0.54 |
| Dodecanoic Acid | 0   | 100 mM MOPS (9)   | H-Leu-NH <sub>2</sub> | 12.2 | 2.00 |
| Dodecanoic Acid | 1   | 100 mM MOPS (9)   | H-Leu-NH <sub>2</sub> | 12.1 | 2.01 |
| Dodecanoic Acid | 5   | 100 mM MOPS (9)   | H-Leu-NH <sub>2</sub> | 11.5 | 1.94 |
| Dodecanoic Acid | 10  | 100 mM MOPS (9)   | H-Leu-NH <sub>2</sub> | 13.2 | 1.52 |
| Dodecanoic Acid | 20  | 100 mM MOPS (9)   | H-Leu-NH <sub>2</sub> | 16.7 | 0.89 |
| Dodecanoic Acid | 40  | 100 mM MOPS (9)   | H-Leu-NH <sub>2</sub> | 21.5 | 0.50 |
| Oleic Acid      | 0   | 100 mM MOPS (8)   | H-Leu-NH <sub>2</sub> | 25.1 | 1.90 |
| Oleic Acid      | 0.5 | 100 mM MOPS (8)   | H-Leu-NH <sub>2</sub> | 25.3 | 1.81 |
| Oleic Acid      | 1   | 100 mM MOPS (8)   | H-Leu-NH <sub>2</sub> | 26.1 | 1.67 |
| Oleic Acid      | 1.5 | 100 mM MOPS (8)   | H-Leu-NH <sub>2</sub> | 24.3 | 1.80 |
| Oleic Acid      | 2   | 100 mM MOPS (8)   | H-Leu-NH <sub>2</sub> | 24.1 | 1.80 |
| Oleic Acid      | 5   | 100 mM MOPS (8)   | H-Leu-NH <sub>2</sub> | 24.8 | 1.69 |
| Oleic Acid      | 10  | 100 mM MOPS (8)   | H-Leu-NH <sub>2</sub> | 26.3 | 1.44 |
| Oleic Acid      | 20  | 100 mM MOPS (8)   | H-Leu-NH <sub>2</sub> | 30.4 | 1.02 |
| Oleic Acid      | 40  | 100 mM MOPS (8)   | H-Leu-NH <sub>2</sub> | 32.1 | 0.84 |
| Oleic Acid      | 0   | 100 mM PIPPS (9)  | H-Leu-NH <sub>2</sub> | 15.1 | 2.11 |
| Oleic Acid      | 0.5 | 100 mM PIPPS (9)  | H-Leu-NH <sub>2</sub> | 16.0 | 2.00 |
| Oleic Acid      | 1   | 100 mM PIPPS (9)  | H-Leu-NH <sub>2</sub> | 16.2 | 1.91 |
| Oleic Acid      | 1.5 | 100 mM PIPPS (9)  | H-Leu-NH <sub>2</sub> | 16.7 | 1.77 |
| Oleic Acid      | 2   | 100 mM PIPPS (9)  | H-Leu-NH <sub>2</sub> | 17.2 | 1.70 |
| Oleic Acid      | 5   | 100 mM PIPPS (9)  | H-Leu-NH <sub>2</sub> | 19.1 | 1.34 |
| Oleic Acid      | 10  | 100 mM PIPPS (9)  | H-Leu-NH <sub>2</sub> | 22.6 | 1.04 |
| Oleic Acid      | 20  | 100 mM PIPPS (9)  | H-Leu-NH <sub>2</sub> | 26.5 | 0.77 |
| Oleic Acid      | 40  | 100 mM PIPPS (9)  | H-Leu-NH <sub>2</sub> | 33.2 | 0.57 |
| DOPA            | 0   | 100 mM MOPS (8)   | H-Leu-NH <sub>2</sub> | 17.5 | 2.02 |
| DOPA            | 0.5 | 100 mM MOPS (8)   | H-Leu-NH <sub>2</sub> | 17.7 | 2.06 |
| DOPA            | 1   | 100 mM MOPS (8)   | H-Leu-NH <sub>2</sub> | 17.9 | 1.61 |
| DOPA            | 1.5 | 100 mM MOPS (8)   | H-Leu-NH <sub>2</sub> | 17.0 | 1.55 |
| DOPA            | 2   | 100 mM MOPS (8)   | H-Leu-NH <sub>2</sub> | 17.3 | 1.51 |
| DOPA            | 2.5 | 100 mM MOPS (8)   | H-Leu-NH <sub>2</sub> | 18.5 | 1.28 |
| DOPA            | 3   | 100 mM MOPS (8)   | H-Leu-NH <sub>2</sub> | 19.4 | 1.41 |
| DOPA            | 10  | 100 mM MOPS (8)   | H-Leu-NH <sub>2</sub> | 20.1 | 1.07 |

|            |     |                  |                       |       |      |
|------------|-----|------------------|-----------------------|-------|------|
| DoTAB      | 0   | 100 mM MOPS (8)  | H-Leu-NH <sub>2</sub> | 19.5  | 2.00 |
| DoTAB      | 10  | 100 mM MOPS (8)  | H-Leu-NH <sub>2</sub> | 16.7  | 1.69 |
| DoTAB      | 20  | 100 mM MOPS (8)  | H-Leu-NH <sub>2</sub> | 14.4  | 1.68 |
| DoTAB      | 40  | 100 mM MOPS (8)  | H-Leu-NH <sub>2</sub> | 13.1  | 1.65 |
| SDS        | 0   | 100 mM PIPPS (9) | H-Leu-NH <sub>2</sub> | 11.8  | 2.01 |
| SDS        | 2.5 | 100 mM PIPPS (9) | H-Leu-NH <sub>2</sub> | 12.0  | 1.88 |
| SDS        | 5   | 100 mM PIPPS (9) | H-Leu-NH <sub>2</sub> | 12.3  | 1.75 |
| SDS        | 8   | 100 mM PIPPS (9) | H-Leu-NH <sub>2</sub> | 12.5  | 1.56 |
| SDS        | 10  | 100 mM PIPPS (9) | H-Leu-NH <sub>2</sub> | 12.6  | 1.45 |
| SDS        | 15  | 100 mM PIPPS (9) | H-Leu-NH <sub>2</sub> | 13.10 | 1.27 |
| SDS        | 20  | 100 mM PIPPS (9) | H-Leu-NH <sub>2</sub> | 13.5  | 1.15 |
| SDS        | 30  | 100 mM PIPPS (9) | H-Leu-NH <sub>2</sub> | 14.0  | 0.99 |
| SDS        | 50  | 100 mM PIPPS (9) | H-Leu-NH <sub>2</sub> | 14.0  | 0.85 |
| Oleic Acid | 0   | 100 mM MOPS (8)  | Glycine               | 54.7  | -    |
| Oleic Acid | 1.5 | 100 mM MOPS (8)  | Glycine               | 62.4  | -    |
| Oleic Acid | 5   | 100 mM MOPS (8)  | Glycine               | 57.6  | -    |
| Oleic Acid | 0   | 100 mM MOPS (8)  | Alanine               | 31.4  | 3.76 |
| Oleic Acid | 1.5 | 100 mM MOPS (8)  | Alanine               | 32.9  | 2.89 |
| Oleic Acid | 5   | 100 mM MOPS (8)  | Alanine               | 35.0  | 2.27 |
| Oleic Acid | 0   | 100 mM MOPS (8)  | Leucine               | 25.8  | 1.52 |
| Oleic Acid | 1.5 | 100 mM MOPS (8)  | Leucine               | 23.7  | 1.41 |
| Oleic Acid | 5   | 100 mM MOPS (8)  | Leucine               | 21.5  | 1.31 |
| DoTAB      | 0   | 100 mM MOPS (8)  | Leucine               | 11.5  | 1.27 |
| DoTAB      | 10  | 100 mM MOPS (8)  | Leucine               | 11.5  | 1.27 |
| DoTAB      | 20  | 100 mM MOPS (8)  | Leucine               | 12.3  | 1.16 |
| DoTAB      | 40  | 100 mM MOPS (8)  | Leucine               | 5.81  | 0.93 |

---

**Table S2** Total yield, measured by the relative HPLC areas of Ac-Tyr(Me)-Leu-NH<sub>2</sub> peptides products (detection at 273 nm), and diastereoselectivity (*d.r.* homochiral vs. heterochiral) of the reactions carried out in organic solvents from Ac-Tyr(Me) oxazolone (1mM) in the presence of 5 mM H-Leu-NH<sub>2</sub> and different carboxylic acid reagents at room temperature.

| Carboxylic acid  | Conc. / mM | Organic Solvent                 | Time of reaction | Total yield % | <i>d.r.</i> |
|------------------|------------|---------------------------------|------------------|---------------|-------------|
| Acetic Acid (x2) | 0          | CH <sub>2</sub> Cl <sub>2</sub> | 1 hour           | 17.4          | 0.84        |
| Acetic Acid (x2) | 2          | CH <sub>2</sub> Cl <sub>2</sub> | 1 hour           | 60.5          | 0.39        |
| Acetic Acid (x2) | 5          | CH <sub>2</sub> Cl <sub>2</sub> | 1 hour           | 79.2          | 0.42        |
| Acetic Acid (x2) | 10         | CH <sub>2</sub> Cl <sub>2</sub> | 1 hour           | 86.2          | 0.49        |
| Decanoic Acid    | 0          | CH <sub>2</sub> Cl <sub>2</sub> | 1 hour           | 16.6          | 0.79        |
| Decanoic Acid    | 2          | CH <sub>2</sub> Cl <sub>2</sub> | 1 hour           | 65.5          | 0.41        |
| Decanoic Acid    | 4          | CH <sub>2</sub> Cl <sub>2</sub> | 1 hour           | 81.4          | 0.47        |
| Decanoic Acid    | 10         | CH <sub>2</sub> Cl <sub>2</sub> | 1 hour           | 86.9          | 0.54        |
| Acetic Acid      | 0          | CH <sub>3</sub> CN              | 1 hour           | 2.7           | 0.62        |
| Acetic Acid      | 2          | CH <sub>3</sub> CN              | 1 hour           | 15.7          | 0.38        |
| Acetic Acid      | 5          | CH <sub>3</sub> CN              | 1 hour           | 29.5          | 0.40        |
| Acetic Acid      | 10         | CH <sub>3</sub> CN              | 1 hour           | 45.3          | 0.44        |
| Decanoic Acid    | 0          | CH <sub>3</sub> CN              | 1 hour           | 2.7           | 0.62        |
| Decanoic Acid    | 2          | CH <sub>3</sub> CN              | 1 hour           | 19.2          | 0.38        |
| Decanoic Acid    | 5          | CH <sub>3</sub> CN              | 1 hour           | 38.2          | 0.40        |
| Decanoic Acid    | 10         | CH <sub>3</sub> CN              | 1 hour           | 55.7          | 0.46        |
| Ac-D,L-Leu-OH    | 0          | CH <sub>3</sub> CN              | 1 hour           | 2.7           | 0.62        |
| Ac-D,L-Leu-OH    | 2          | CH <sub>3</sub> CN              | 1 hour           | 25.1          | 0.55        |
| Ac-D,L-Leu-OH    | 5          | CH <sub>3</sub> CN              | 1 hour           | 31.7          | 0.59        |
| Ac-D,L-Leu-OH    | 10         | CH <sub>3</sub> CN              | 1 hour           | 44.0          | 0.64        |
| Ac-D,L-Leu-OH    | 2          | CH <sub>3</sub> CN              | 3 days           | 86.0          | 0.61        |
| Ac-D,L-Leu-OH    | 5          | CH <sub>3</sub> CN              | 3 days           | 69.3          | 0.70        |
| Ac-D,L-Leu-OH    | 10         | CH <sub>3</sub> CN              | 3 days           | 68.0          | 0.73        |
| Ac-L-Leu-OH      | 0          | CH <sub>3</sub> CN              | 1 hour           | 2.6           | 0.53        |
| Ac-L-Leu-OH      | 2          | CH <sub>3</sub> CN              | 1 hour           | 18.4          | 0.52        |
| Ac-L-Leu-OH      | 5          | CH <sub>3</sub> CN              | 1 hour           | 32.9          | 0.57        |
| Ac-L-Leu-OH      | 10         | CH <sub>3</sub> CN              | 1 hour           | 45.5          | 0.62        |

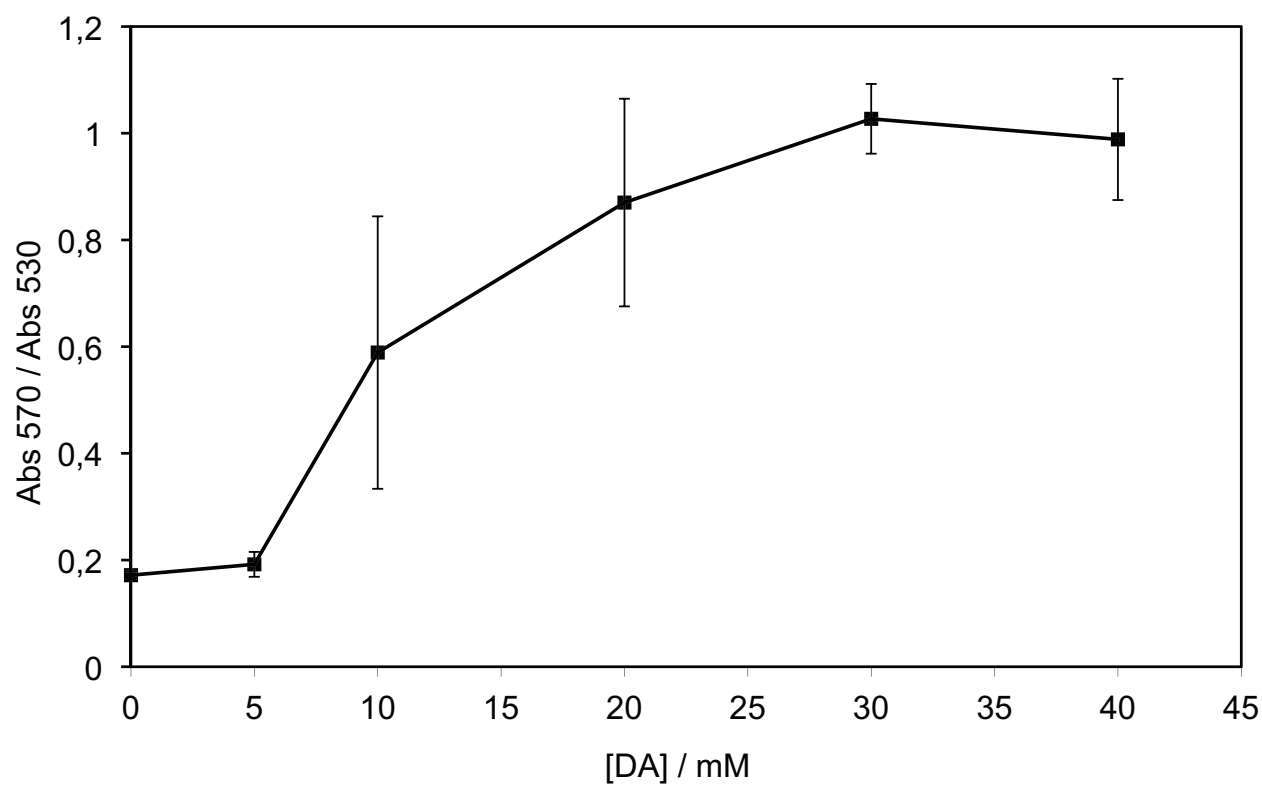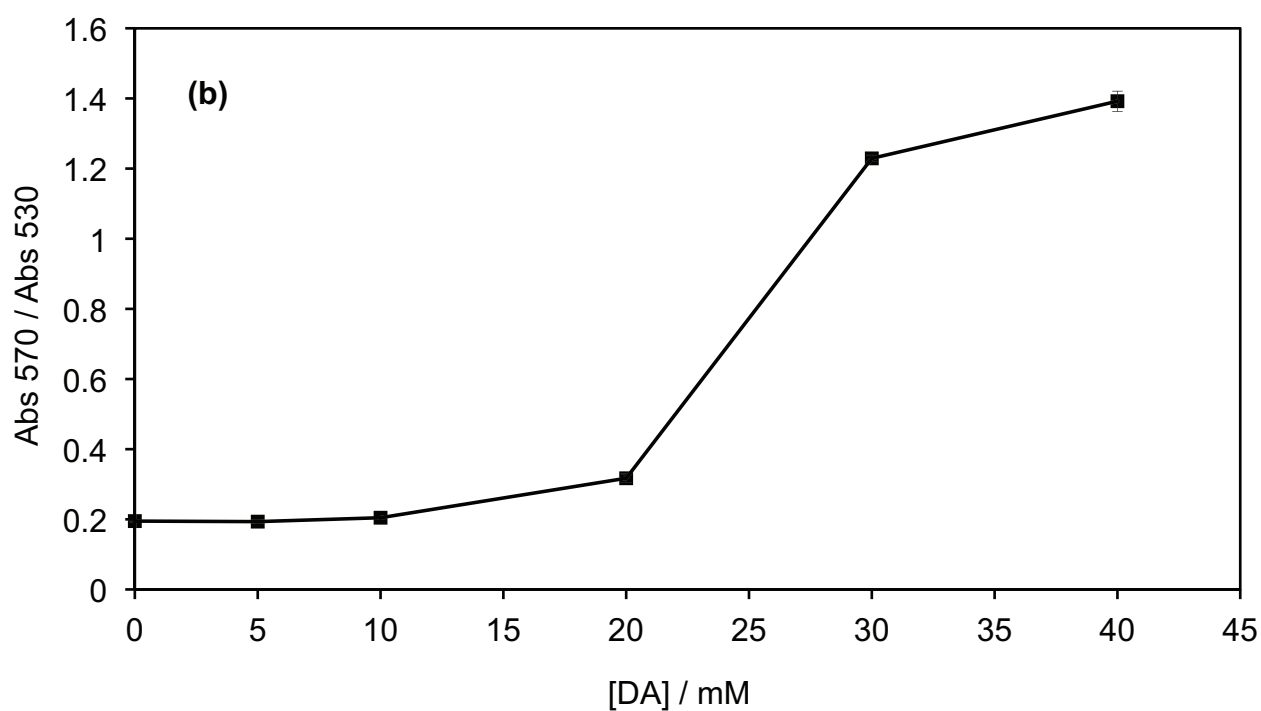

**Fig. S2** Measurement (Merocyanine 570 assay) of the CVC of decanoic acid (DA) in **(a)** 100 mM MES buffer at pH 6.5; and **(b)** 100 mM MOPS buffer at pH 7.2; both in the presence of 5 mM H-Leu-NH<sub>2</sub>. The large error bars in panel **(a)** reflect the instability of the dispersion at pH values departing from the effective pK<sub>a</sub> of decanoic acid. Less reproducible results are obtained in that pH range (or lower) due to the formation of inhomogeneous droplets. A similar protocol was followed to determine the CVC of dodecanoic acid (DoA) and oleic acid (OA).

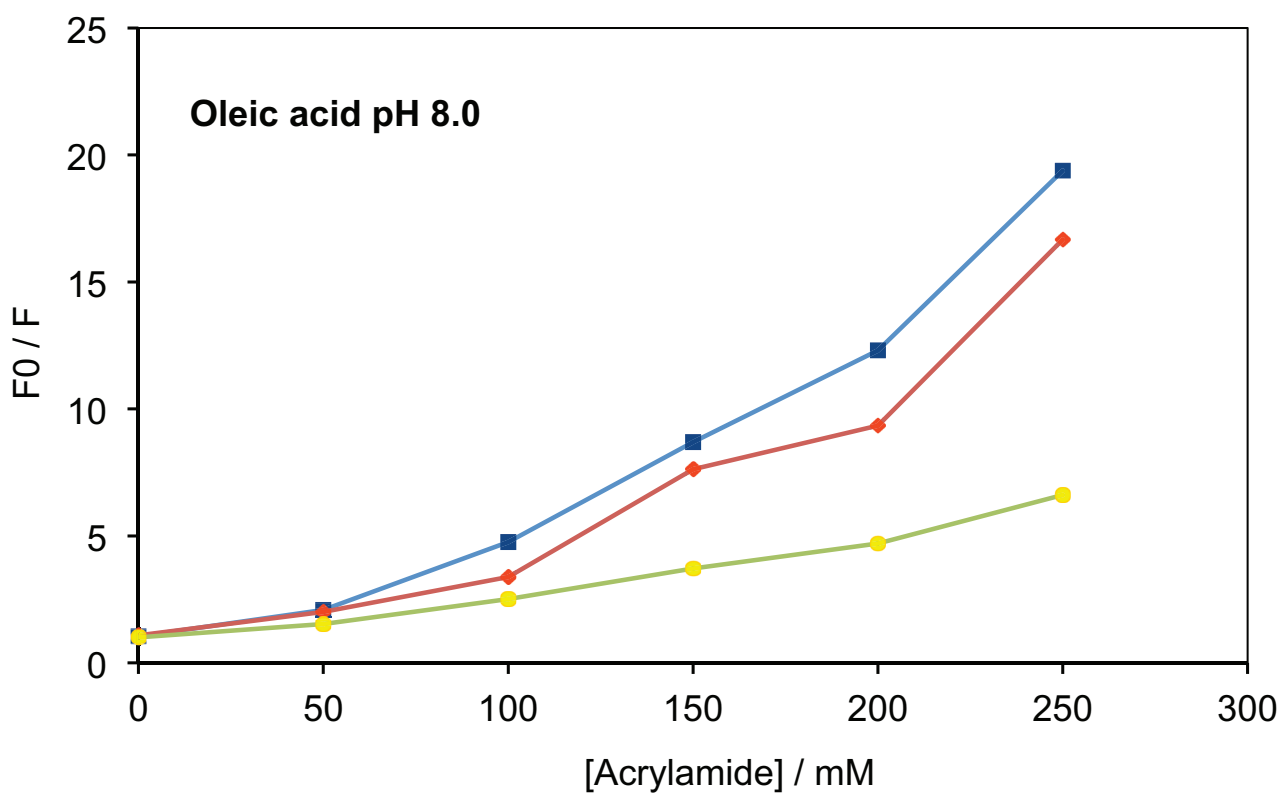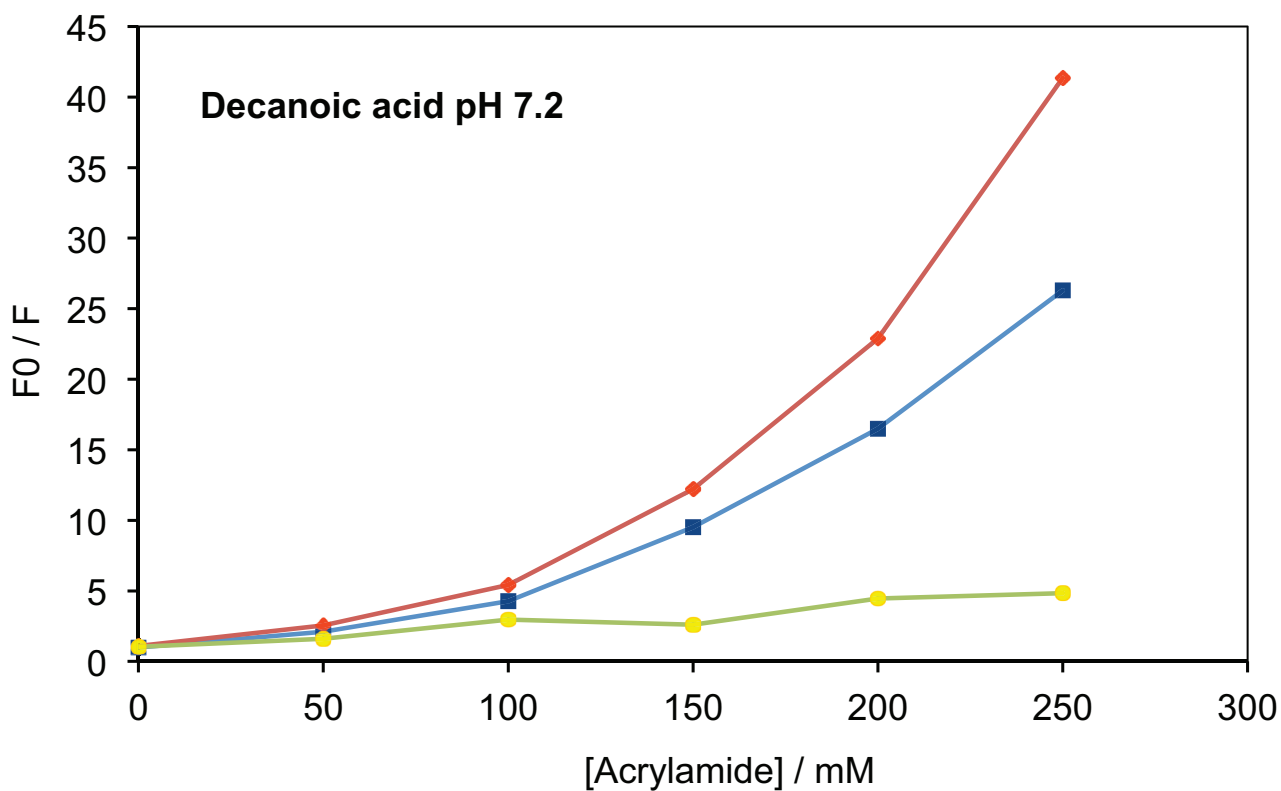

**Fig. S3** Binding of Ac-L-Tyr(Me)-L-Leu-NH<sub>2</sub> (1  $\mu$ M overall concentration) to the vesicles in 100 mM MOPS buffer solutions to which increasing amounts of acrylamide were added; control experiment without fatty acid (blue squares); fatty acid concentration (0.05 mM for oleic acid and 10 mM for decanoic acid) below the CVC (red diamonds); fatty acid concentration (1 mM for oleic acid and 40 mM for decanoic acid) above the CVC (yellow filled circles). Lower slope values show a higher protection of the membrane against quenching by acrylamide.



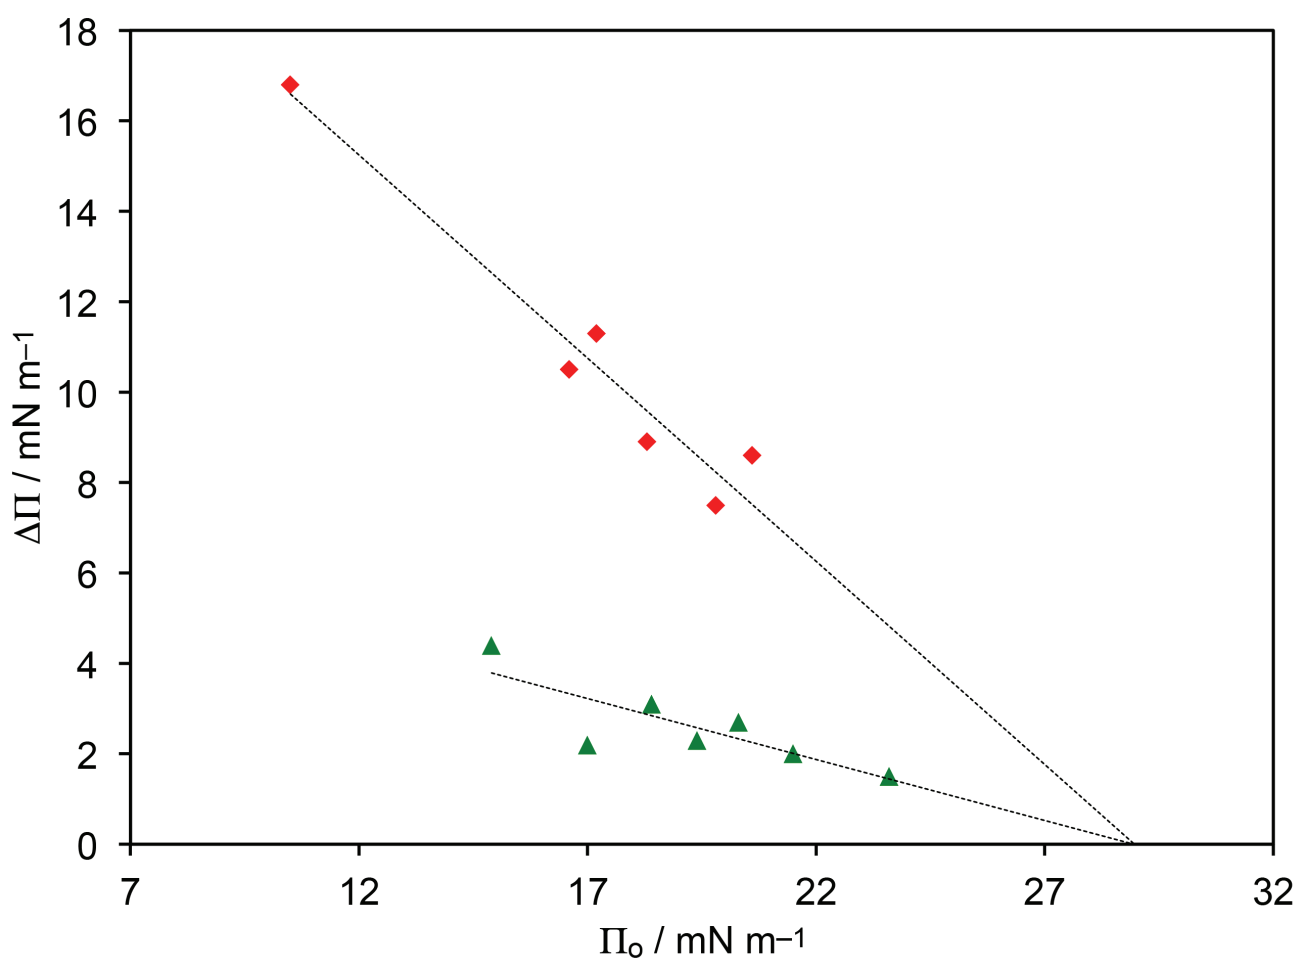

**Fig. S4** Interaction of the dipeptide Ac-L-Tyr(Me)-L-Leu-NH<sub>2</sub> with decanoic acid monolayers at different initial surface pressures ( $\pi_0$ ). DA monolayers were prepared with different initial surface pressures. The dipeptide was injected into the aqueous subphase and the resulting increase in surface pressure ( $\Delta\pi$ ) was recorded. This increment in surface pressure is due to the adsorption of the dipeptide to the fatty acid monolayer. The experiment was carried out at pH 6.5 (red diamonds) and pH 7.2 (green triangles). The intercept of the regression lines with the abscissa axis yields the critical pressure ( $\pi_c$ ), *i. e.* the initial surface pressure at which the dipeptide is no longer able to adsorb to the monolayer. Notice that the critical pressure is the same for both pH values. This indicates that the interfacial properties of the monolayer do not change with the pH.

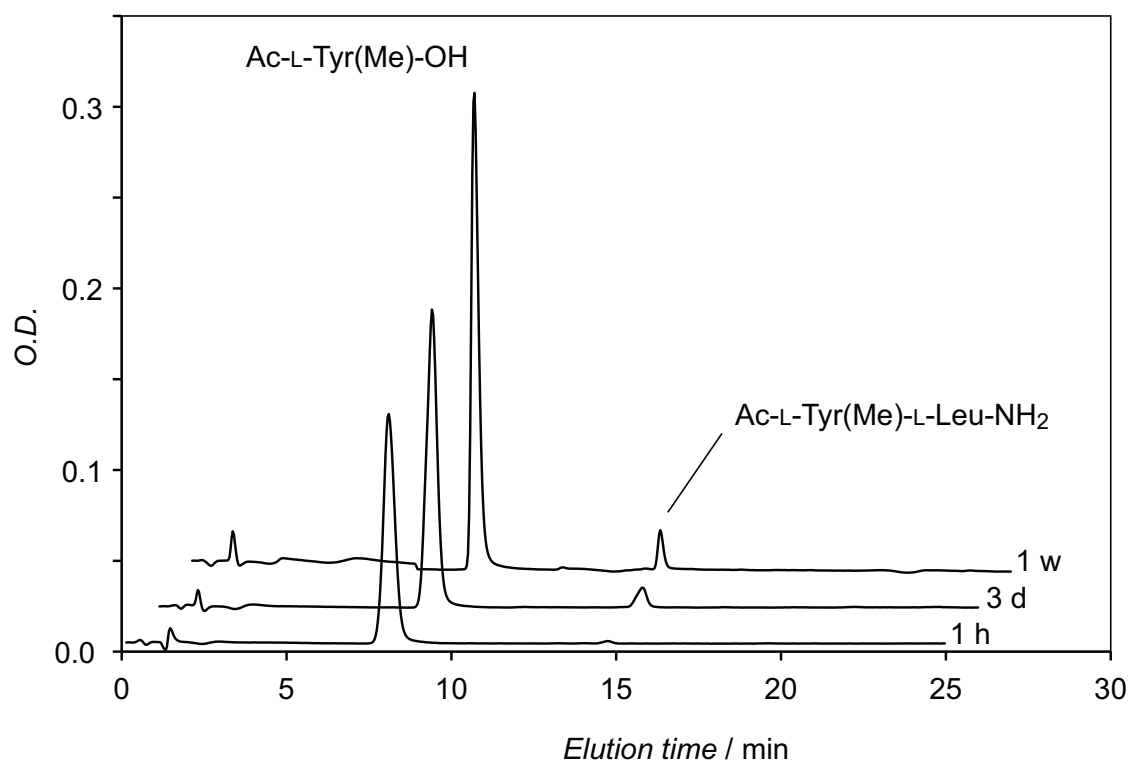

**Fig. S5** HPLC analysis of the reaction media obtained by reaction of 2 mM Ac-Leu oxazolone with 5 mM H-L-Leu-NH<sub>2</sub> in the presence of 1 mM Ac-L-Tyr(Me)-OH in CH<sub>3</sub>CN; analysis of sample withdrawn after 1h, 3 days and 1 week. The detection wavelength value of 273 nm allows monitoring the products of Ac-L-Tyr(Me)-OH bearing the methylated phenol moiety separately from other species.
